# Supplementary material
Source: publisher figshare collection journal article supplement (https://acs.figshare.com/ndownloader/files/4580551)
Supplement: Supplementary file 1 [file 4580551]

**Supporting Information for “Electrolyte Tuning of Surfactant Interfacial Behavior for Enhanced Density-Based Separation of Single-Walled Carbon Nanotubes”**

*Sandip Niyogi, Crystal G. Densmore, Stephen K. Doorn*

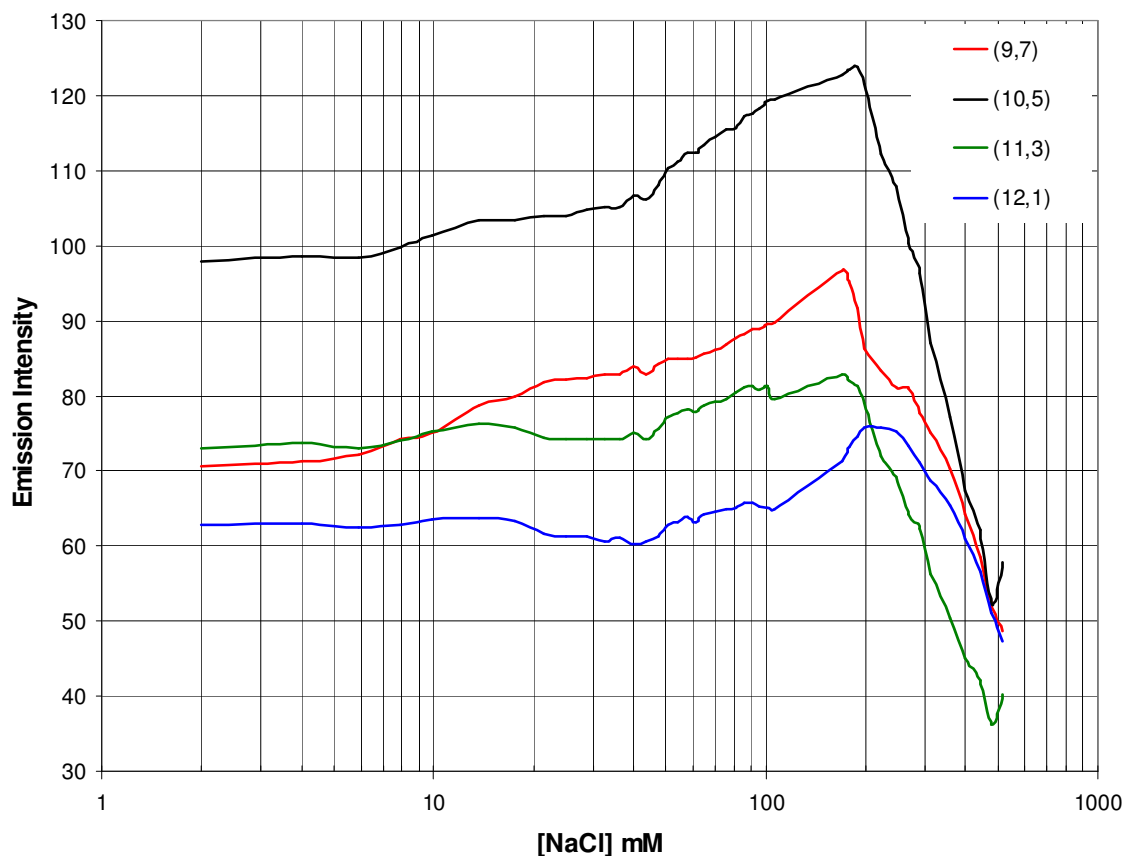

**Figure S1.** The peak photoluminescence intensity at 780 nm excitation of multiple chiralities plotted against the concentration of NaCl added to 500  $\mu$ L of a 1.25% SDS-SWNT dispersion.

The NaCl concentration at which onset of nanotube bundling occurs ( $\sim 180$  mM) is found to be sensitive to initial SDS concentration. The higher SDS concentration (1.25%) used here delays onset of bundling to higher salt concentrations, compared to the 1% SDS behavior of Figure 1(a) of the main text.

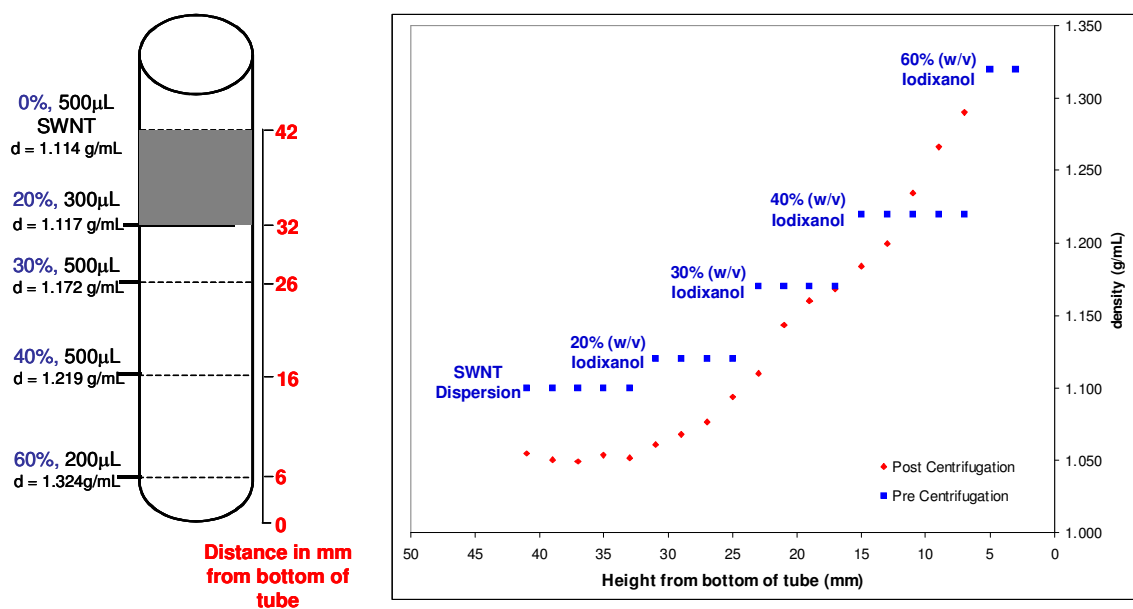

**Figure S2.** Density (g/mL) vs height above bottom of centrifuge tube (in mm) before (blue squares) and after (red diamonds) centrifugation.

The result demonstrates how the initial 60/40/30/20 percent iodixanol step-gradient linearizes over the course of the ultracentrifugation time.
